# Supplementary material for: Racial Disparities in Speeding Citations in Texas: Examining Discrimination against Asian American Drivers
Source: Research Square preprint supplement (doi:10.21203/rs.3.rs-7972878/v1), 2026-01-23
Supplement: Supplementary file 1 [file 95f70c6711a86bdfc04f4daa.docx]

Supplementary Materials for

**Racial Disparities in Speeding Citations in Texas: Examining Discrimination against Asian American Drivers**

**Fig. S1. Racial/ethnic disparities in the predicted probability of receiving a speeding citation by driver race/ethnicity and sex.**

Average predicted probabilities derived from a logistic regression model predicting citation receipt for speeding-related stops that includes interaction terms of driver sex with driver race, controlling for county type and pooled across all years (2006-2017).

**Fig. S2.** **Racial/ethnic Disparities in the** **predicted probability of citation by driver race/ethnicity and county type.**

Predicted probabilities derived from a logistic regression model predicting citation receipt for speeding-related stops that includes interaction terms of driver race and county type, controlling for driver sex type and pooled across all years (2006-2017).

**Fig. S3.** **Racial/ethnic disparities in odds of receiving a speeding ticket relative to White drivers across 12 Texas regions.**

Odds ratios of Black, Hispanic, and Asian/Pacific Islander drivers receiving a citation after being stopped for a speeding-related offense relative to White drivers between 2006-2017 in all 12 economic regions in Texas as defined by the Texas Comptroller. Driver sex has been controlled for. Dotted lines represent 95% confidence intervals. Economic regions: (**A**) Alamo; (**B**) Capital; (**C**) Central Texas; (**D**) Gulf Coast; (**E**) High Plains; (**F**) Metroplex; (**G**) Northwest; (**H**) South Texas; (**I**) Southeast; (**J**) Upper East; (**K**) Upper Rio Grande; and (**L**) West Texas.

**Fig. S4.** **Racial/ethnic disparities in odds of receiving a speeding ticket relative to White drivers for border and non-border counties in Texas.**

Odds ratios of Black, Hispanic, and Asian/Pacific Islander drivers receiving a citation after being stopped for a speeding-related offense relative to White drivers between 2006-2017 in (**A**) border; and (**B**) non-border counties. Driver sex has been controlled for. Dotted lines represent 95% confidence intervals.

**Fig. S5.** **Racial/ethnic disparities in the** **predicted probability of citation by driver race/ethnicity and severity of speeding offense.**

Predicted probabilities of receiving a citation for White, Black, Hispanic, and Asian/Pacific Islander drivers for (**A**) serious, and (**B**) non-serious speeding offenses. Driver race and county type are controlled for.

**Fig. S6.** **Racial/ethnic disparities in odds of receiving a speeding ticket relative to White drivers by time of day.**

Odds ratios of Black, Hispanic, and Asian/Pacific Islander drivers receiving a citation after being stopped for a speeding-related offense relative to White drivers during (**A**) daytime; and (**B**) nighttime. Driver sex and county type are controlled for. Dotted lines represent 95% confidence intervals.

**Fig. S7. Racial/ethnic disparities in odds of being searched and odds of contraband being found for speeding-related traffic stops in Texas.**

(**A**) Odds ratios of being searched conditional on being stopped for a speeding-related offense for Black, Hispanic and Asian/Pacific Islander drivers relative to White drivers, 2006 to 2017. (**B**) Odds ratios of contraband being found conditional on having been searched for a speeding-related offense for Black, Hispanic, and Asian/Pacific Islander drivers relative to White drivers, 2006 to 2017. Driver sex and county type are controlled for. Dotted lines represent 95% confidence intervals.

| Description | Counts / Percentages |
| --- | --- |
| Total number of traffic stops (all violations) | 27,426,840 |
| **Stops with speeding violations only**  All speeding stops  Speeding stops with complete driver race and driver sex information | 12,160,826  11,842,734 |
| Citation issued for speeding stops | 30.68% |
| **Driver Race for speeding stops**  White  Black  Hispanic  Asian/Pacific Islander | 64.77%  8.92%  24.49%  1.82% |
| **County Type for speeding stops**  Metropolitan  Micropolitan  Non-core | 52.00%  18.91%  29.09% |
| **Driver Sex for speeding stops**  Male  Female | 65.16%  34.84% |

**Table S1. Details of the dataset for traffic stops by Texas Highway Patrol between 2006-2017.**

Number of traffic stop records and distribution of the dataset in terms of driver race, county type, and driver sex.
